# Supplementary material
Source: publisher figshare collection journal article supplement (https://sage.figshare.com/ndownloader/files/21599595)
Supplement: Supplementary file 1 [file 21599595]

Table 2

Summary of main findings.

| Author         | Main findings                                                                                                                                                                                                                                                                                                                                                  |
|----------------|----------------------------------------------------------------------------------------------------------------------------------------------------------------------------------------------------------------------------------------------------------------------------------------------------------------------------------------------------------------|
| Tyrka          | Disruption or lack of adequate parental nurturing, was associated with increased gene methylation, which was in turn linked to attenuated cortisol responses                                                                                                                                                                                                   |
| Haas           | Lower OXT DNA methylation (presumably linked to higher OXT expression) results in more secure attachment styles and improved ability to recognize emotional facial expressions. These findings provide a link between epigenetic modification and sociability in humans.                                                                                       |
| Jones-Mason    | Within the unresolved category of attachment, low-SES (Socio Economic Status) unresolved participants had higher levels of methylation than mid/upper-SES participants did. SES was unrelated to methylation within the secure and organized categories. This suggests that the quality of attachment relationships may impact epigenetic processes.           |
| Lawn           | A cumulative score of several psychosocial adversity measures such as sexual abuse, were associated with DNA methylation age acceleration in adulthood suggesting a potential for adverse outcomes.                                                                                                                                                            |
| Ebner          | The study assessed associations between <i>OXTR</i> methylation, plasma oxytocin (OT), and attachment in young and older adults and found lower methylation and higher OT to be associated with less attachment anxiety in young but not older adults.                                                                                                         |
| Unternaehrer   | Low maternal caregiving in childhood was associated with greater DNA methylation in an <i>OXTR</i> and a <i>BDNF</i> target sequence in adulthood indicating components of the epiphenotype from early life stress.                                                                                                                                            |
| Ein-Dor        | This study examined relations between intra-individual differences in attachment and epigenetic modification of the oxytocin receptor ( <i>OXTR</i> ) and glucocorticoid receptor ( <i>NR3C1</i> ) gene promoter. Attachment avoidance was significantly and specifically associated with increased <i>OXTR</i> and <i>NR3C1</i> promoter methylation          |
| Mulder         | A study of stress reactivity, and specifically of associations between attachment, extreme maternal insensitivity and gene methylation, with cortisol reactivity to the Strange Situation Procedure. It was found that <i>FKBP5</i> methylation seems to moderate the associations of <i>FKBP5</i> genotype and resistant attachment with cortisol reactivity. |
| Schechter      | Maternal severity of interpersonal violence exposure was associated with diagnosis of maternal post-traumatic stress disorder. • This was in turn associated with disturbed child attachment.                                                                                                                                                                  |
| Bosman         | This study found that more stressed children who experience less maternal support reported increased anxious attachment when their <i>NR3C1</i> gene was highly methylated. This effect could not be explained by the children's level of psychopathology.<br>These findings indicate that epigenetic processes are involved in attachment development.        |
| Van Ijzendoorn | The study found associations between 5HTTLPR polymorphisms and psychological problems to be significantly influenced by environmentally induced methylation patterns. This indicates methylation to be a mediating factor between adverse environment and developmental trajectories.                                                                          |
